# Supplementary material for: Effects of drought stress and water recovery on physiological responses and gene expression in maize seedlings
Source: PubMed Central journal article supplement (PMC5913800; doi:10.1186/s12870-018-1281-x), 2018-04-23
Supplement: 12870_2018_1281_MOESM1_ESM.pdf [file 12870_2018_1281_MOESM1_ESM.pdf]

Premiers used in the validation of RNA-seq data by means of qRT-PCR.

| Gene ID       | Premier name | Premier sequences (5'-3') | Product (bp)   |
|---------------|--------------|---------------------------|----------------|
| GRMZM2G127379 | F            | ACGCACCAGCAAGCAATAA       | 176            |
|               | R            | GCCGTCACCTCGCTTCCTCT      |                |
| GRMZM2G171468 | F            | ACAAGTCGGAGGATGGCTACAG    | 261            |
|               | R            | GACTCAAACAAAACGCCTATCA    |                |
| GRMZM2G032807 | F            | AGCATACCCGCAGCAAGAAC      | 279            |
|               | R            | CCATTCCACCAACACCTCCA      |                |
| GRMZM2G048129 | F            | GGTGATGGTAGGGCAAAGCA      | 151            |
|               | R            | GAATAAGTCAAACGGAGGGAGC    |                |
| GRMZM2G062531 | F            | CACGGCTCCTACAGGCTTCG      | 183            |
|               | R            | GGGCTGAACGGGAAATGGT       |                |
| GRMZM2G088396 | F            | TTGCTGTGGCACTTTGTATCAT    | 214            |
|               | R            | TACTGACCCTCGTCGTTATTTT    |                |
| GRMZM2G108273 | F            | TACAAGACGCACGAGCCG        | 179            |
|               | R            | TCCCACAATCCCACCAG         |                |
| GRMZM2G120304 | F            | CCCTGGTGAACAAGGAAATG      | 146            |
|               | R            | CGGAATGGAAACGCAAATAC      |                |
| GRMZM2G117412 | F            | CCAGGAGACTTTGGATTTGACC    | 232            |
|               | R            | CCATCTGCGACACGAACAGC      |                |
| GRMZM2G033885 | F            | GCTGGGACTTGGTGGTTTG       | 110            |
|               | R            | TGTATCCTCGGTCATCTCAATCT   |                |
| GRMZM2G057281 | F            | CCACGCAATGCTGTAGGACC      | 220            |
|               | R            | TGCTCAGGCTTGGAGAAAGG      |                |
| GRMZM2G036880 | F            | GGCACAACAACATCGGAGAC      | 257            |
|               | R            | GAGGTTAGTGGCTGAGGAAGAA    |                |
| GRMZM2G149428 | F            | ACCTGCTCACCGTCATCTCC      | 300            |
|               | R            | CCAACTCAAACGCACCCTTA      |                |
| GRMZM2G451224 | F            | AGACGGACAAGCCAAGCA        | 251            |
|               | R            | AATTCGGCGGATCGTATCG       |                |
| GRMZM2G026015 | F            | GCTCTGGGCCTACTTTCTCC      | 223            |
|               | R            | GAACAGGTTACATCCCAATCCA    |                |
| GRMZM2G005433 | F            | CCAAGCAGGGAACAAATCA       | 165            |
|               | R            | CGATACGCCGTGGAACAAC       |                |
| GRMZM2G008892 | F            | CCTCTTCAACAGCGTACCAG      | 165            |
|               | R            | CCGCCTTTGTATCCACGAACT     |                |
| GRMZM2G175562 |              | GAACCAAGTCCCCGACCATC      | 186            |
|               |              | TCGTCCAGCGTGTACGTGAG      |                |
| GRMZM2G077333 |              | GCCCATCAACGAGATAGAGCC     | 181            |
|               |              | CGAGACGCACAGTCACAGGTAA    |                |
| ACTB          | F            | CACCTTCTACAACGAGCTCC      | Yue et al,2015 |

|  |   |                      |  |
|--|---|----------------------|--|
|  | R | CAGTCAGGATCTTCATGAGG |  |
|--|---|----------------------|--|
