# Supplementary material for: Effects of drought stress and water recovery on physiological responses and gene expression in maize seedlings
Source: PubMed Central journal article supplement (PMC5913800; doi:10.1186/s12870-018-1281-x), 2018-04-23
Supplement: 12870_2018_1281_MOESM2_ESM.pdf [file 12870_2018_1281_MOESM2_ESM.pdf]

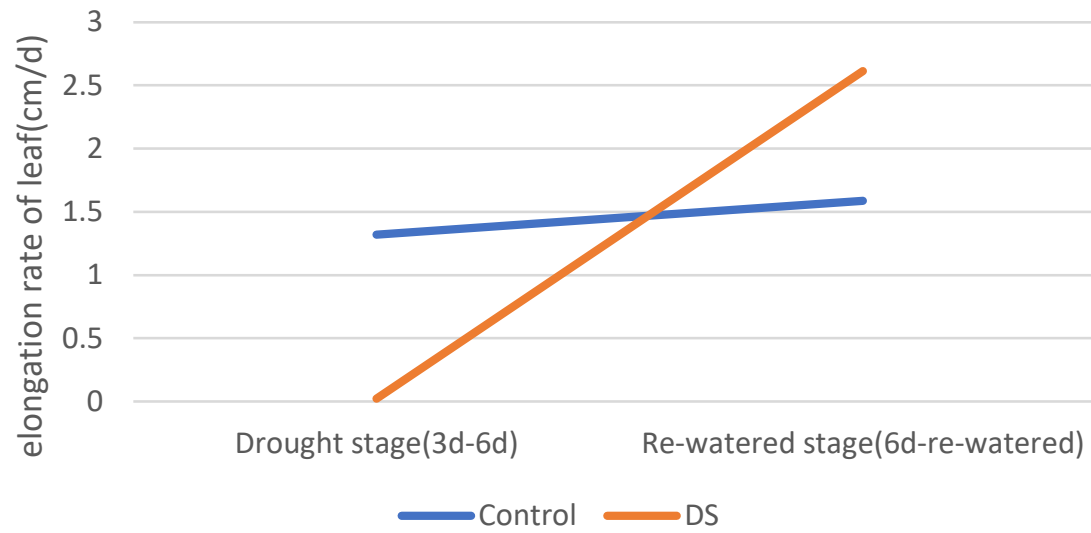

**Figure S1. Elongation rate of leaf during drought treatment stage(3d-6d) and Re-watered stage.** The elongation rate of leaf during drought stage (3d-6d) and re-watered stage for control and drought treatment seedlings were calculated respectively. The X-axis represents two different stages (drought stage from 3d to 6d and re-watered stage from 6d to re-watered). The Y-axis represents the elongation rate of leaf (elongation length of leaf divided by elongation days). Orange line represents drought treatment seedlings and blue line represents control seedlings.

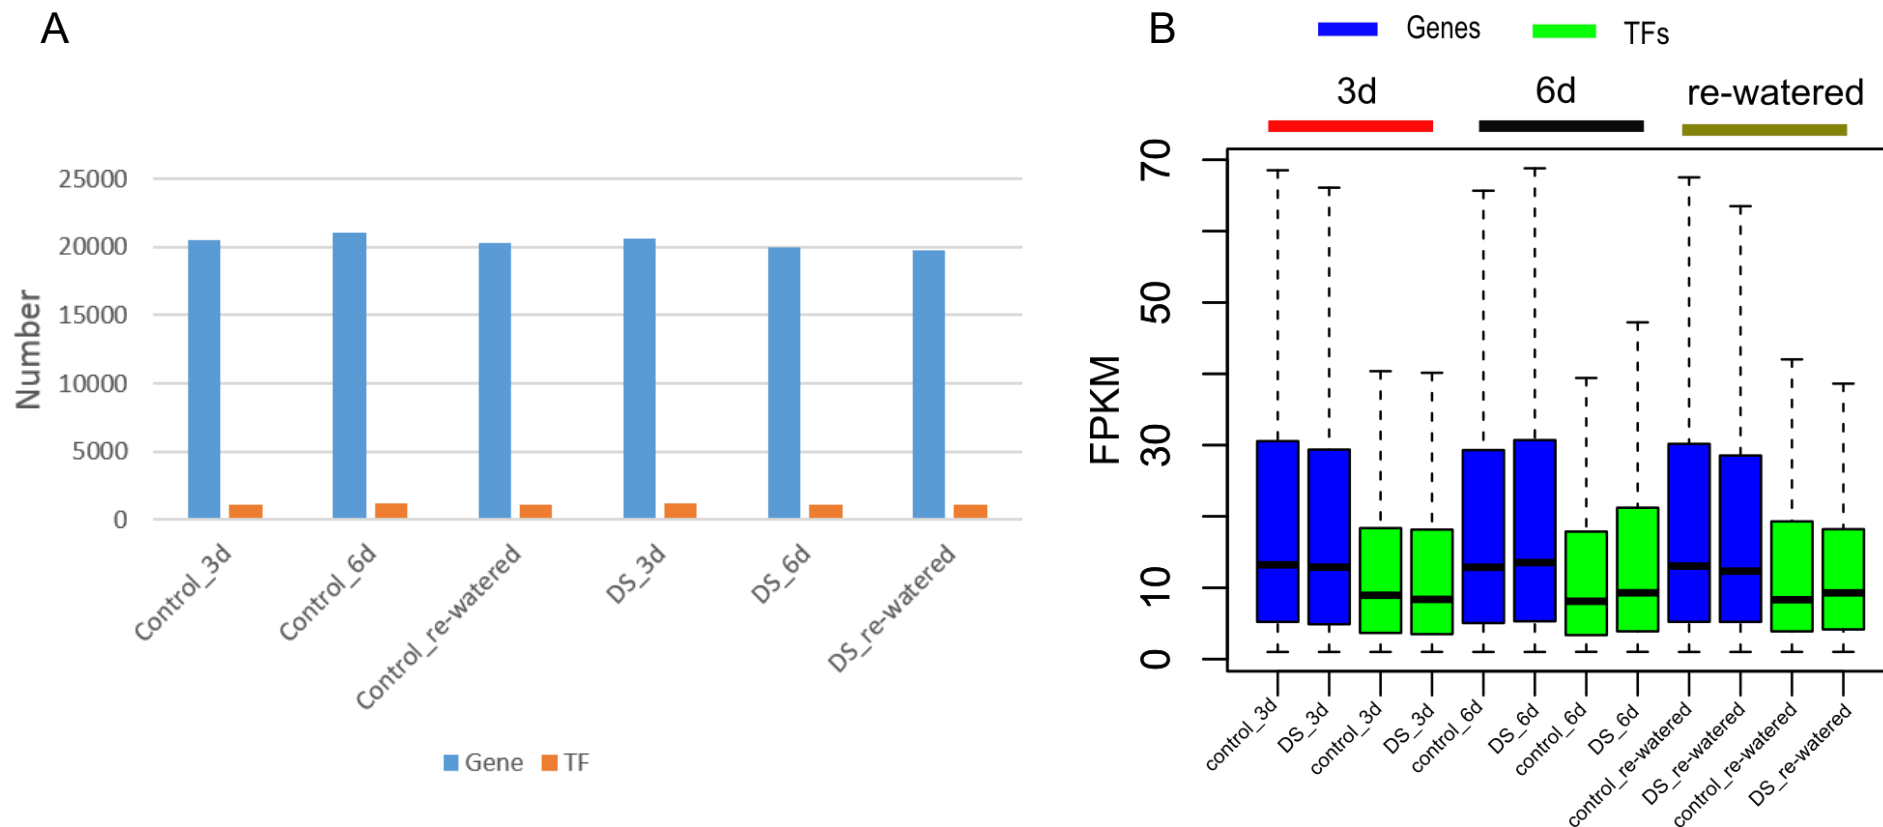

**Figure S2. Global gene expression level.** Number of expressed genes, including those encoding transcription factors (TFs), and their expression levels (median boxplot) after a 3-day or 6-day drought treatment and a 1-day water recovery period according to RNA sequencing data (**A** and **B**)

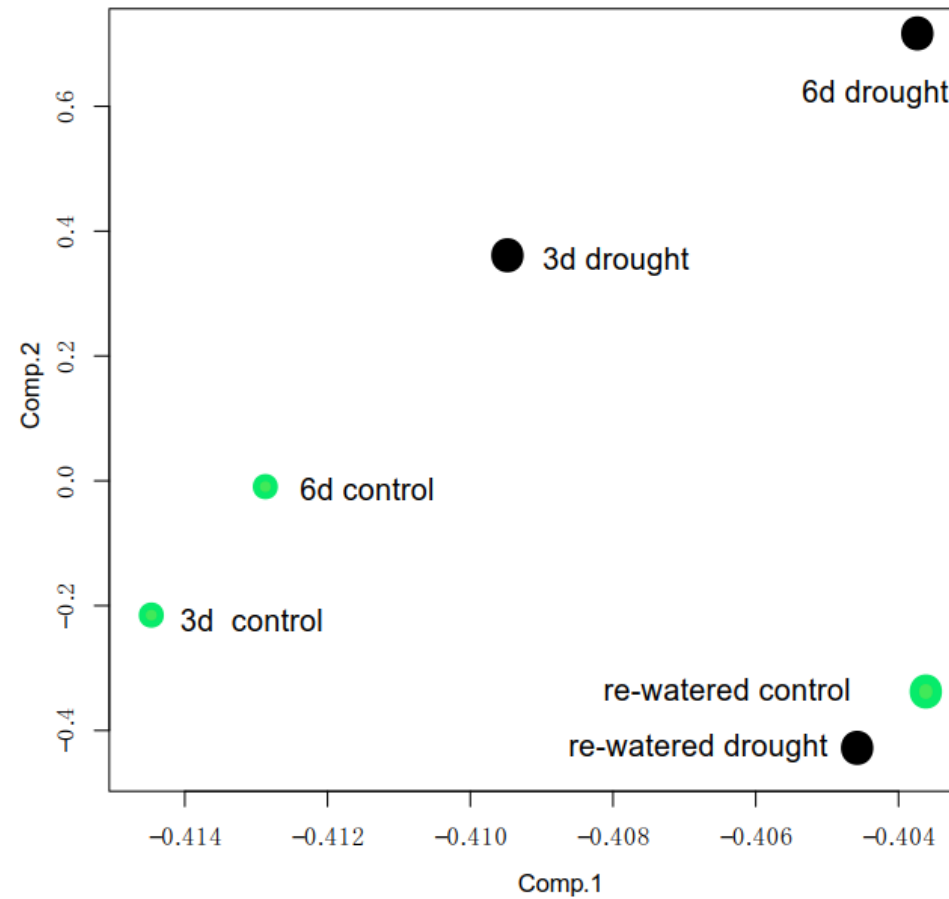

**Figure S3. PCA analysis of six samples in the three time points.** We cluster the six seedling samples in the three time points using R function princomp with expression value(FPKM) as input. Green points show control seedlings and black color show drought treatment seedlings.

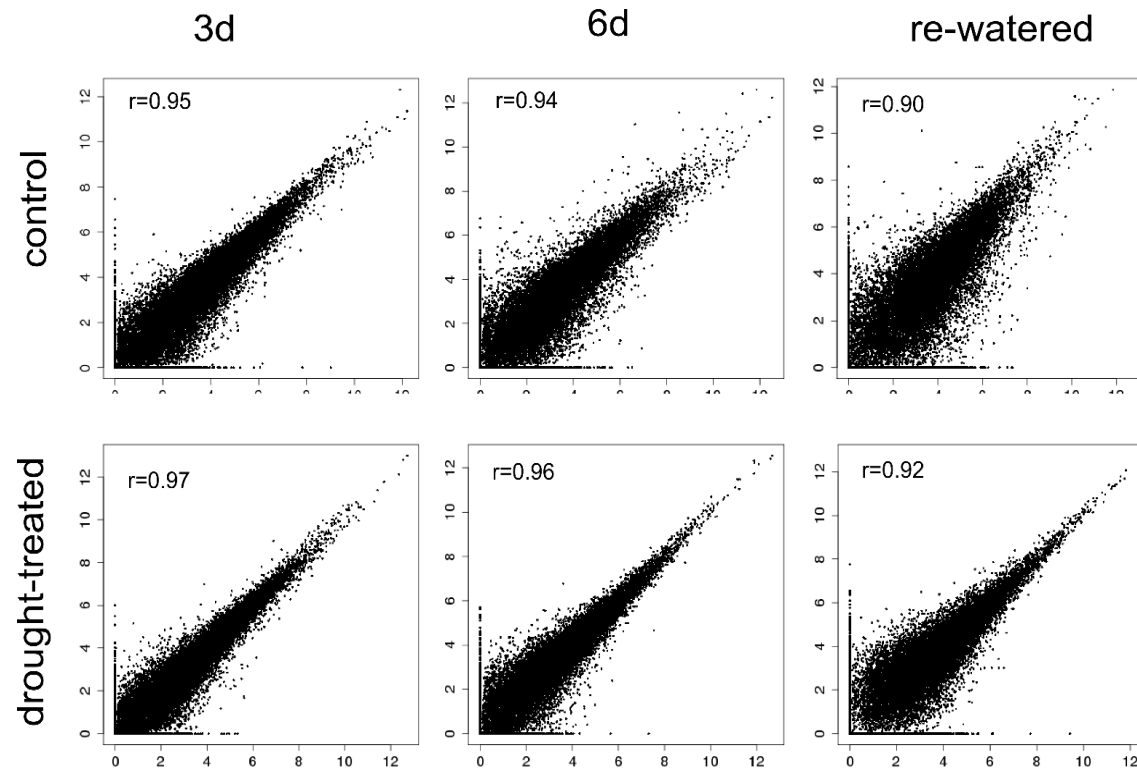

**Figure S4. Correlation analysis between two biological replicates under drought treatments and controls.** We calculated the expression level (FPKM) for each replicate. The normalized data of  $\log_2(\text{FPKM} + 1)$  was used to calculate the Pearson Correlation Coefficient (PCC).

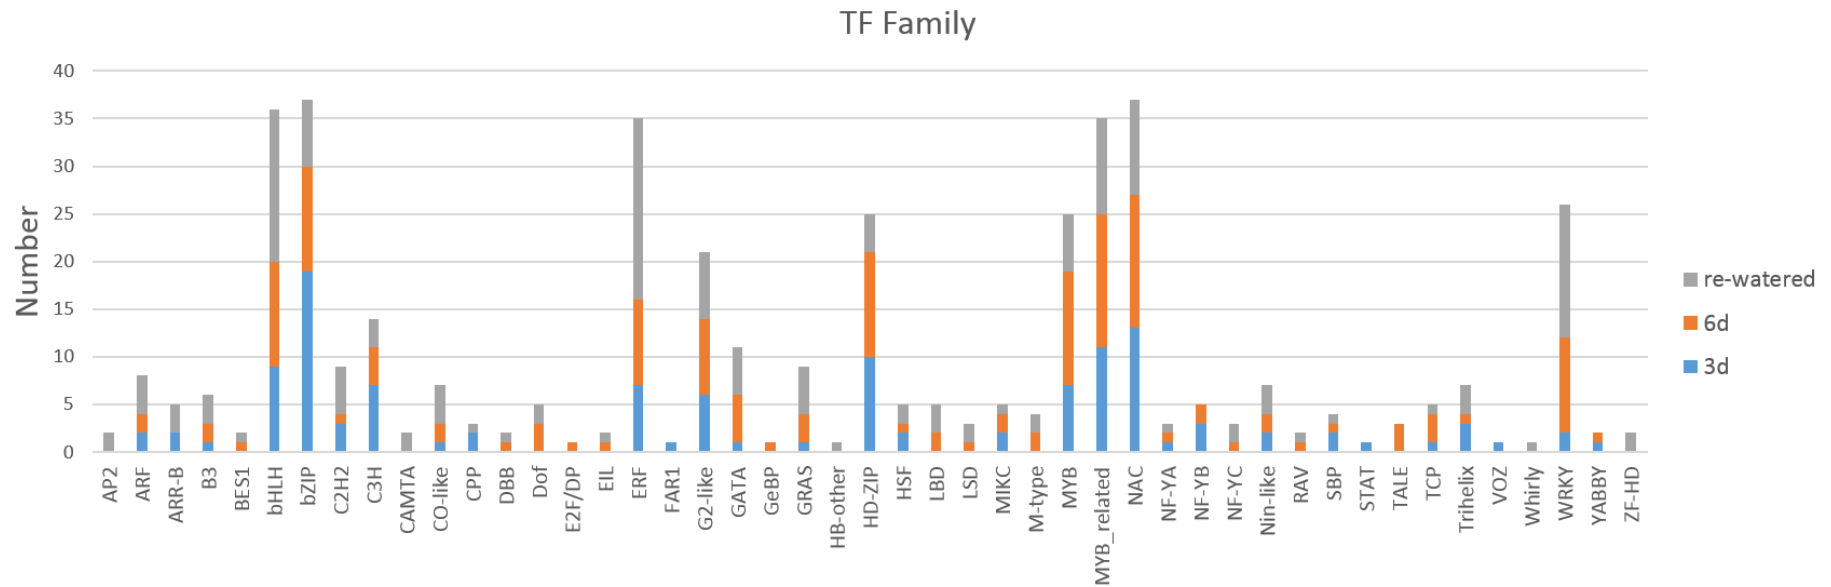

**Figure S5. Number of differentially expressed transcription factor genes in response to drought stress treatments.** The different transcription factor families responding to water deficit and recovery were summarized and compared. The X-axis represents the transcription factor family members. The Y-axis represents the number of differentially expressed family members.

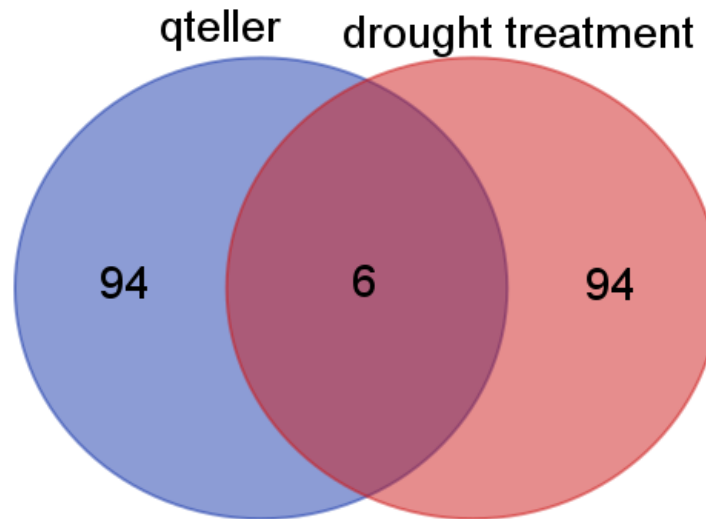

**Figure S6. The identification of Co-expressing genes with *ZmNAC111* Using qTeller data and our drought-treatment data.** We selected the top 100 co-expressing genes with *ZmNAC111* (measure by Pearson correlation coefficient) using public qTeller data and our data, respectively. The overlapped genes were considered as the target genes of *ZmNAC111*.

(A)

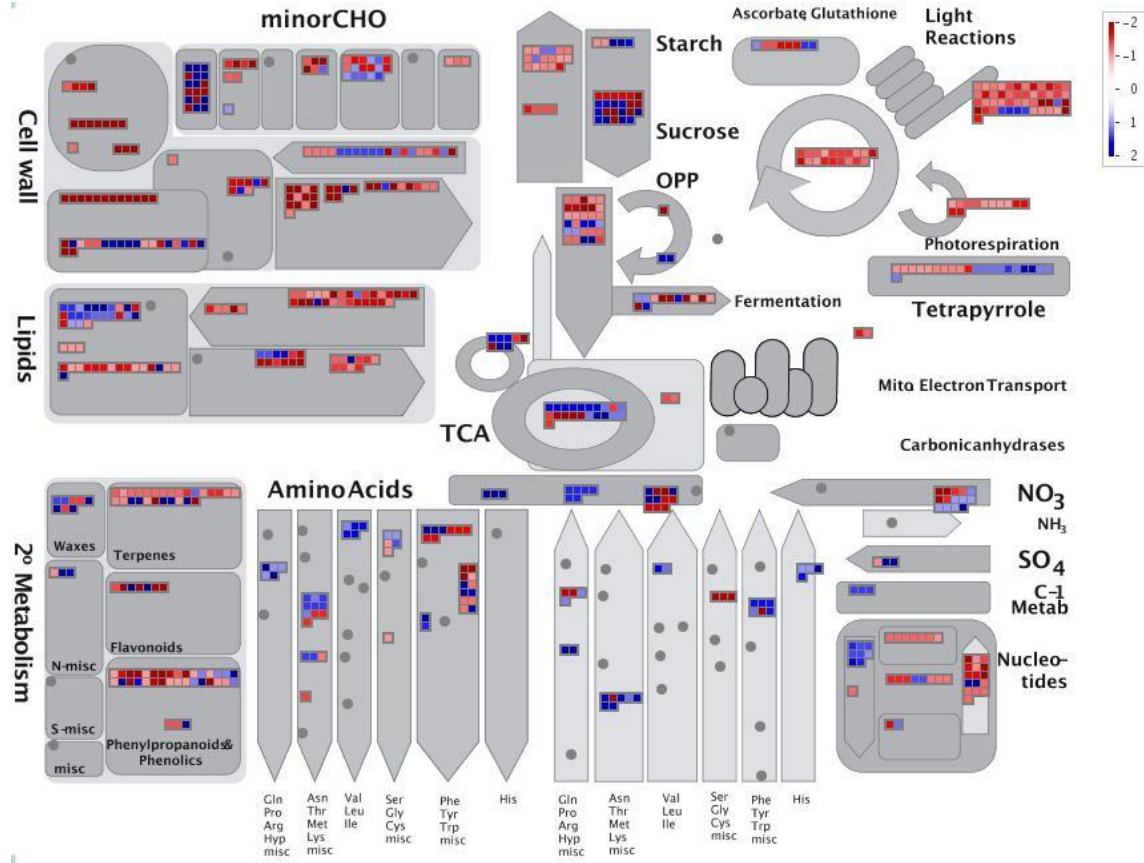

(B)

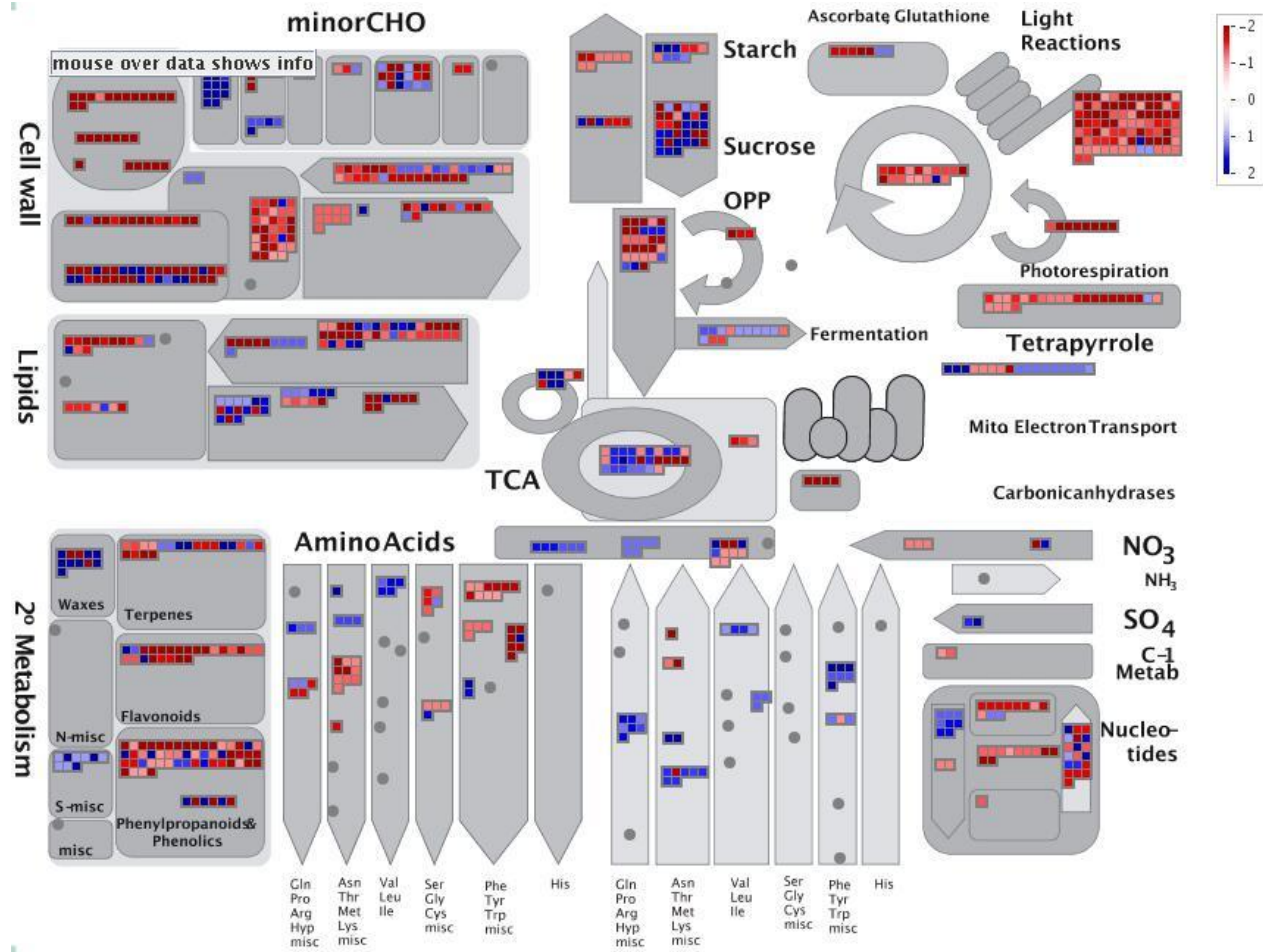



(C)

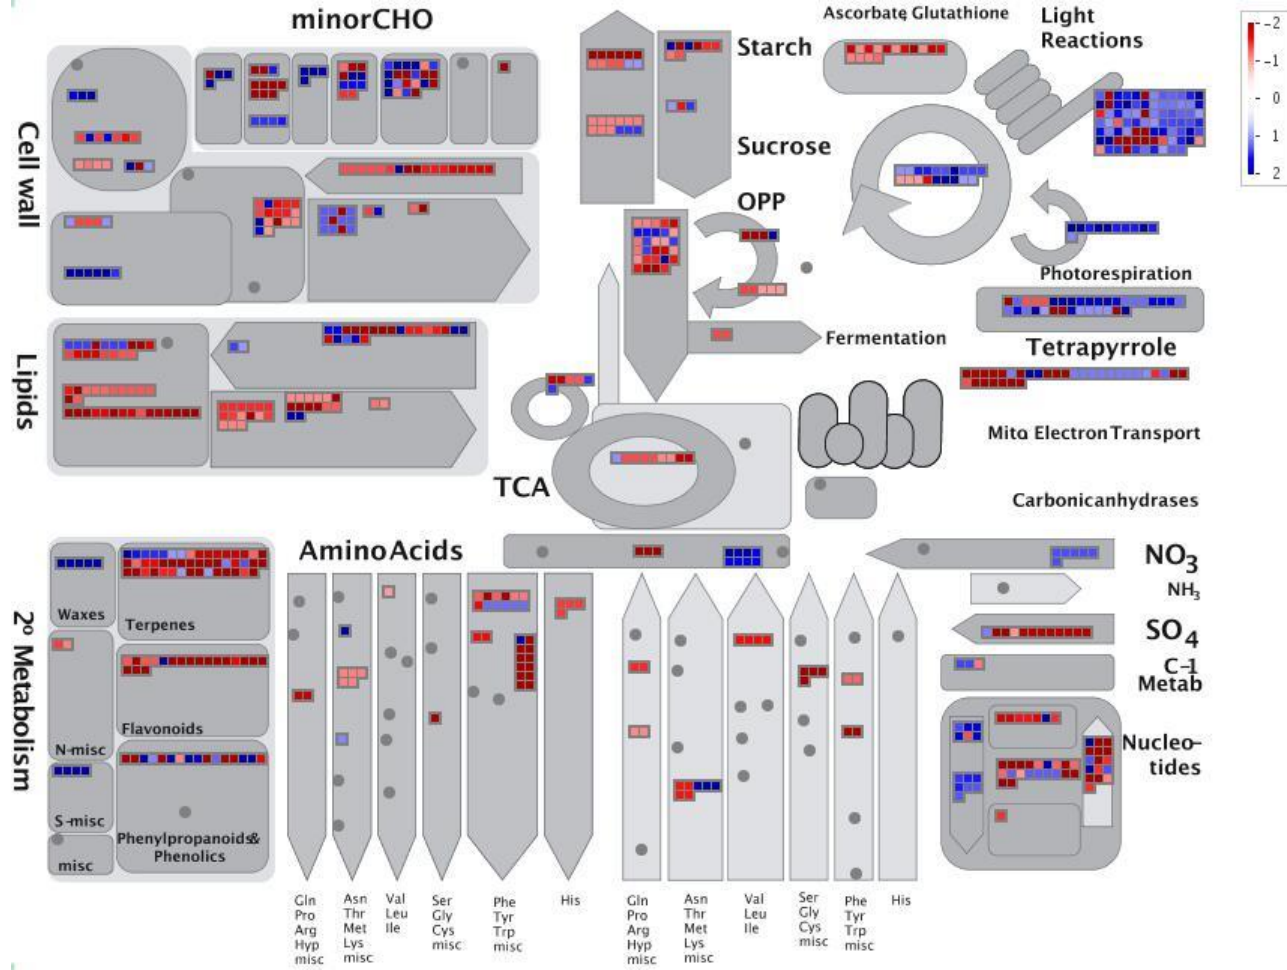

(D)

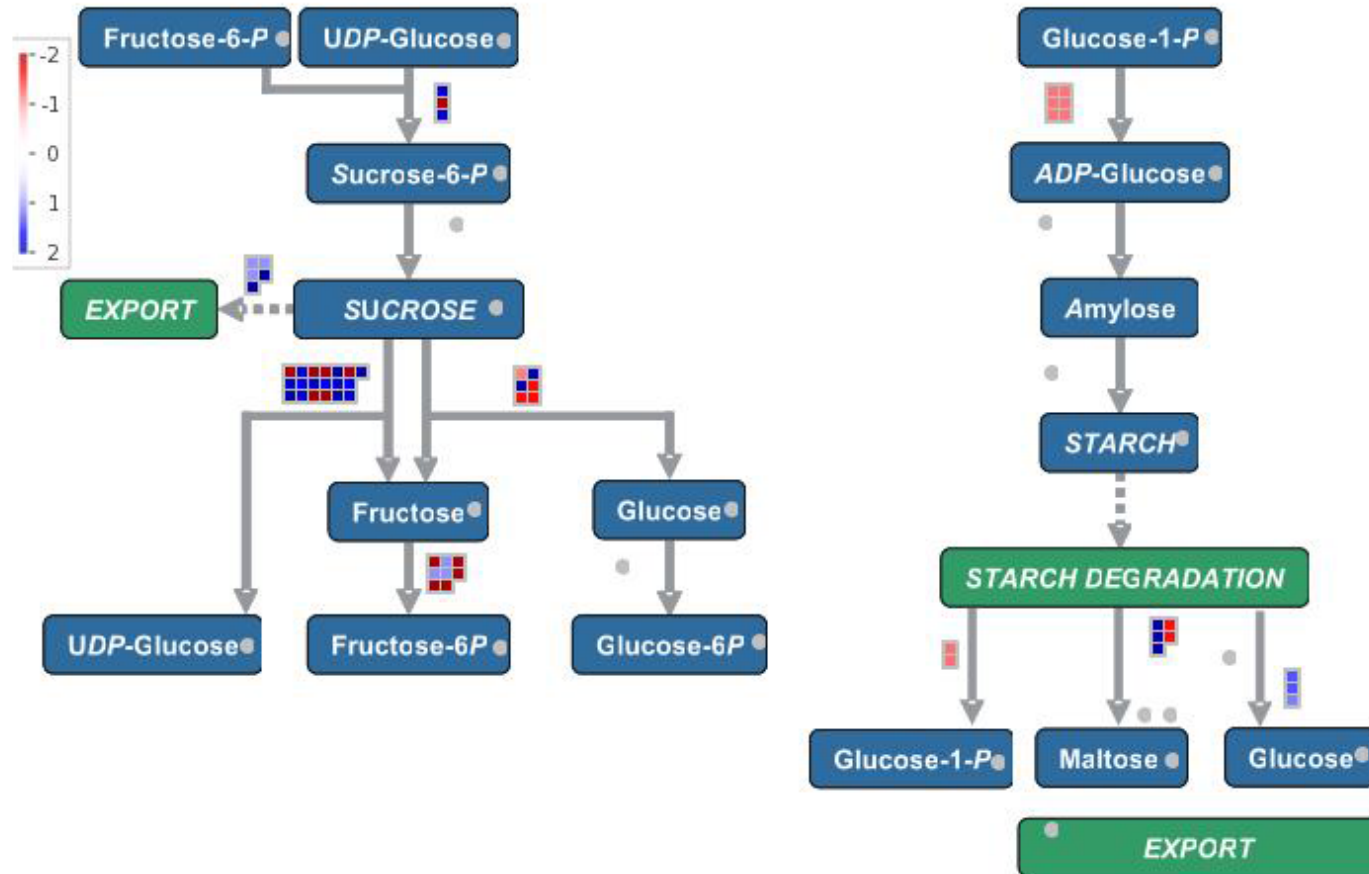

(E)

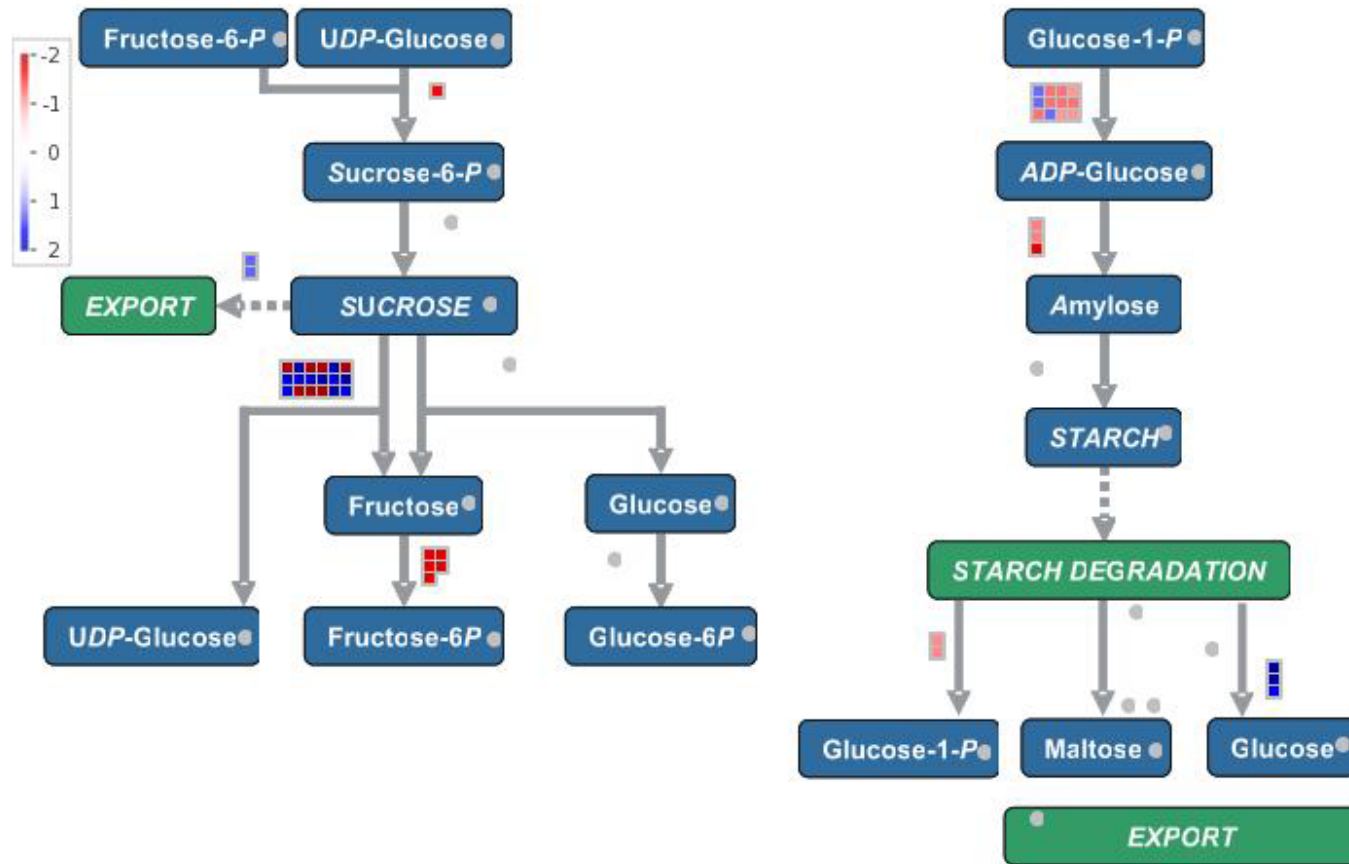

(F)

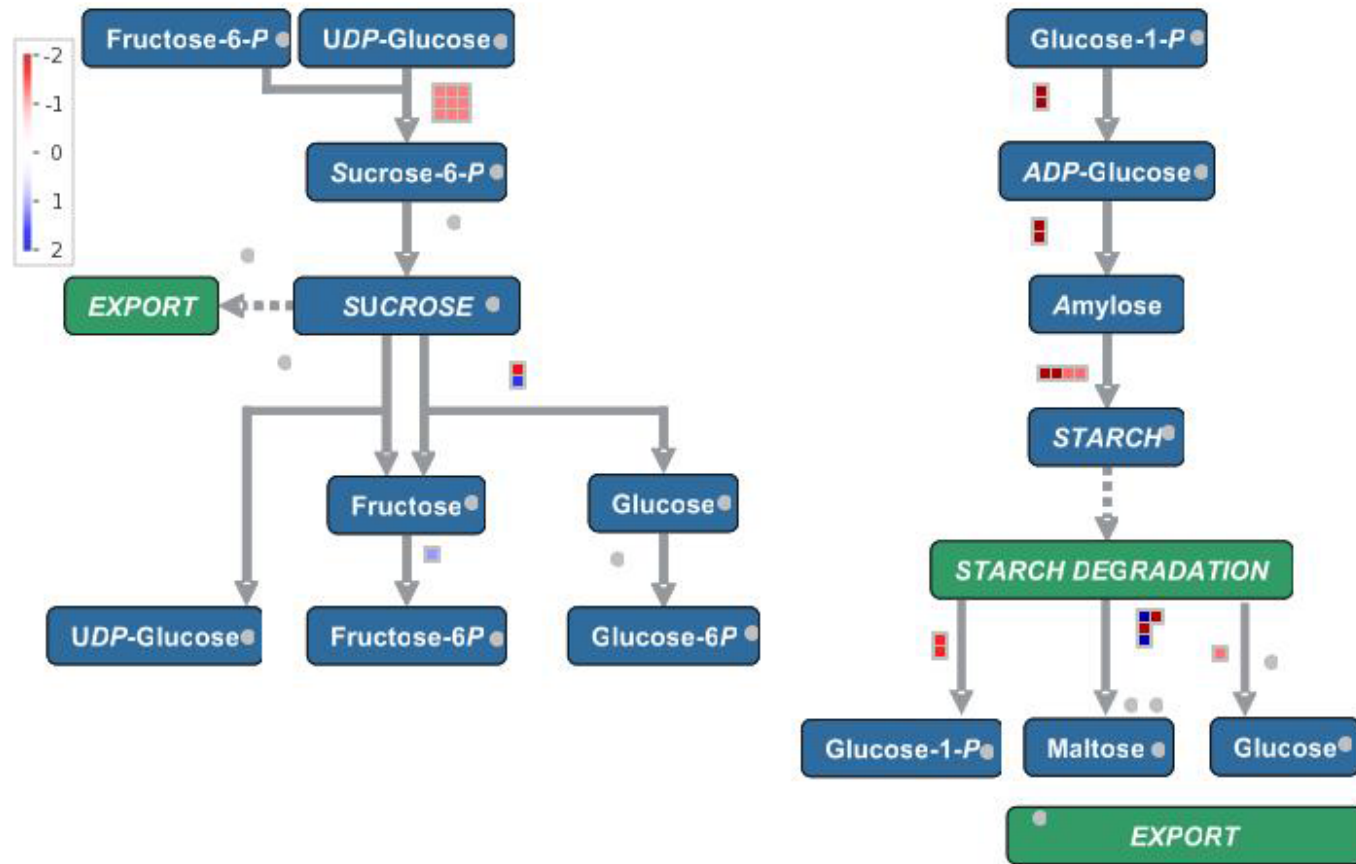

**Figure S7 Overview of different metabolic pathways and carbohydrates affected by the differentially expressed genes in response to drought and water recovery treatments.** Metabolic pathways associated with differentially expressed genes after the 3-day drought treatment (**A**), 6-day drought treatment (**B**), and water recovery period (**C**). Carbohydrate metabolic pathways associated with differentially expressed genes after the 3-day drought treatment (**D**), 6-day drought treatment (**E**), and water recovery period (**F**). In each panel, the expression levels of up- and down-regulated genes are indicated in blue and red, respectively.

|               | 3d    | 6d    | Re_watered |           |
|---------------|-------|-------|------------|-----------|
| GRMZM2G113432 | -1.11 | -2.37 | -0.22      | cellulose |
| GRMZM2G173759 | -1.57 | -1.27 | 0.51       |           |
| GRMZM2G015886 | 0.00  | -2.32 | 0.00       |           |
| GRMZM2G018241 | -0.43 | -1.01 | -0.32      |           |
| GRMZM2G025231 | -0.51 | -1.45 | -0.42      |           |
| GRMZM2G027723 | -0.97 | -1.93 | -0.57      |           |
| GRMZM2G028353 | -0.04 | -1.00 | -0.45      |           |
| GRMZM2G074546 | -1.15 | -2.17 | 1.39       |           |
| GRMZM2G082580 | -0.85 | -1.97 | -0.22      |           |
| GRMZM2G109326 | 0.33  | -1.83 | 1.06       |           |
| GRMZM2G110145 | -0.43 | -1.29 | -0.43      |           |
| GRMZM2G112336 | -0.30 | -1.11 | -0.67      |           |
| GRMZM2G113137 | -0.54 | -1.03 | -0.65      |           |
| GRMZM2G115772 | -0.59 | -1.52 | -0.25      |           |
| GRMZM2G142898 | -0.84 | -1.67 | 0.31       |           |
| GRMZM2G424832 | -0.42 | -1.39 | 0.01       |           |
| GRMZM5G826714 | -0.31 | -1.00 | -0.77      |           |
| GRMZM2G177631 | -0.74 | -1.67 | -1.09      |           |
| GRMZM2G010142 | -0.50 | -0.77 | -1.49      |           |
| GRMZM2G028286 | -0.63 | -0.54 | -1.44      |           |
| GRMZM2G039454 | -0.26 | 0.46  | -1.06      |           |
| GRMZM2G071970 | 0.00  | -0.78 | -1.01      |           |
| GRMZM2G074792 | -0.14 | -0.10 | -1.32      |           |
| GRMZM5G870176 | -0.63 | 0.17  | -1.90      |           |
| GRMZM2G122431 | 1.51  | 1.58  | 1.70       |           |
| GRMZM2G014558 | 0.48  | 0.81  | 3.23       |           |

|               |       |       |       |          |
|---------------|-------|-------|-------|----------|
| GRMZM2G445169 | 0.00  | 0.60  | 0.00  | expansin |
| GRMZM2G176595 | -2.76 | -3.53 | 0.16  |          |
| GRMZM2G082520 | -1.73 | -5.69 | 0.67  |          |
| GRMZM2G004955 | -0.84 | -2.45 | 2.47  |          |
| GRMZM2G013002 | -0.69 | -1.60 | 1.06  |          |
| GRMZM2G013671 | 1.12  | -2.39 | 0.00  |          |
| GRMZM2G021621 | -1.15 | -1.85 | 0.91  |          |
| GRMZM2G056236 | 0.19  | -3.95 | -0.24 |          |
| GRMZM2G327266 | 0.51  | -3.94 | 0.62  |          |
| GRMZM2G339122 | -0.15 | -3.13 | 0.53  |          |
| GRMZM2G361064 | -1.26 | -3.46 | 1.57  |          |
| GRMZM2G154178 | -1.01 | -3.42 | -0.73 |          |
| GRMZM2G026147 | 0.68  | 2.67  | 0.20  |          |
| GRMZM2G095968 | 2.86  | 2.87  | 2.38  |          |
| GRMZM5G859316 | 3.98  | 2.57  | 1.26  |          |
| GRMZM2G021427 | -1.21 | 0.00  | 2.40  |          |

|                  |       |       |       |                |
|------------------|-------|-------|-------|----------------|
| GRMZM2G004699    | -0.85 | -1.95 | 0.01  | xyloglu<br>can |
| GRMZM2G039919    | -1.63 | -2.02 | 1.02  |                |
| GRMZM2G063566    | 0.26  | -2.25 | 1.60  |                |
| GRMZM2G119783    | -1.01 | -4.65 | 0.08  |                |
| GRMZM2G364748    | 1.55  | 1.31  | 1.45  |                |
| AC210669.3_FG001 | 2.75  | -0.84 | -1.93 |                |

**Figure S8 Expression profile of genes involved in cell wall development.** Cellulose, expansin and xyloglucan endotransglucosylase related genes are involved in cell wall development. The fold change value (  $\log_2(\text{MT}/\text{WT})$  ) in the figure is calculated. Green color represent down-regulated genes. Red color represent up-regulated genes.
